# Supplementary material
Source: PubMed Central journal article supplement (PMC3409273)
Supplement: 12_111_Shin.Suppl.pdf [file 12_111_Shin.Suppl.pdf]

# Sprouty Is a Negative Regulator of Transforming Growth Factor $\beta$ -Induced Epithelial-to-Mesenchymal Transition and Cataract

Eun Hye H Shin,<sup>1</sup> M Albert Basson,<sup>2</sup> Michael L Robinson,<sup>3</sup> John W McAvoy,<sup>1</sup> and Frank J Lovicu<sup>1</sup>

Online address: <http://www.molmed.org>

The Feinstein Institute for Medical Research 

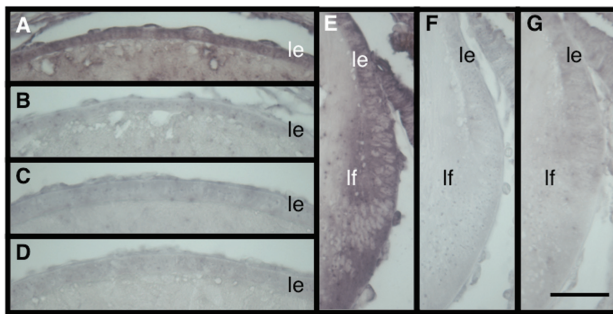

**Supplementary Figure S1.** Expression of *Spry1* and *Spry2* transcripts in the neonatal mouse lens. Representative micrographs of in situ hybridization labeling for *Spry1* mRNA (A-D) or *Spry2* mRNA (E-G) using antisense (A,C,E,G) or sense (B,D,F) digoxigenin-labelled riboprobes, on wild-type (WT) lenses (A,B,E,F) or transgenic lenses deficient for *Spry1* and *Spry2* (*Spry1<sup>fl/fl</sup>/Spry2<sup>fl/fl</sup>*) (C, D,G, using *Le-Cre*). Abbreviations: le, lens epithelium; lf, lens fibers. Scale bar; 50 $\mu$ m.

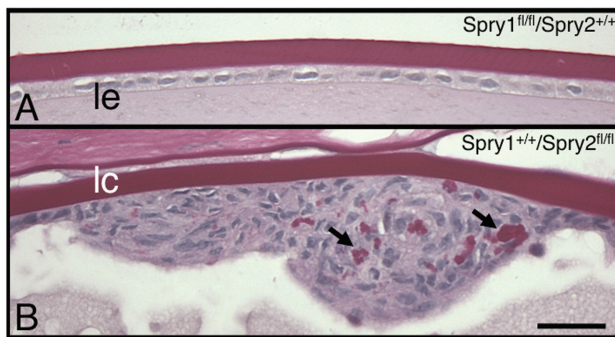

**Supplementary Figure S2.** Histological differences between *Spry1*- and *Spry2*-deficient murine lenses. Representative histological sections of postnatal-d80 mouse lenses deficient for either all alleles of *Spry1* (*Spry1<sup>fl/fl</sup>/Spry2<sup>+/+</sup>*, A) or all alleles of *Spry2* (*Spry1<sup>+/+</sup>/Spry2<sup>fl/fl</sup>*, B) using *MLR10-Cre*, stained with Periodic-Acid Schiff reagent. In *Spry1*-deficient lenses (A), the normal anterior monolayer of central lens epithelial cells (le) is maintained, whereas in *Spry2*-deficient lenses (B), it becomes multilayered with the more posterior cells acquiring a spindle-shaped morphology as they deposit PAS-reactive ECM (arrows) to form an anterior subcapsular plaque. Scale bar; 30 $\mu$ m.
